# Supplementary material for: Crystallization control via a molecular needle knitting strategy for the enhanced emission efficiency and stability of CsPbBr3 films
Source: Royal Society of Chemistry journal article supplement (doi:10.1039/d1tc03980f), 2021-01-01
Supplement: d1tc03980f1.pdf [file d1tc03980f1.pdf]

## Electronic Supplementary Information

### Crystallization Control via a Molecular Needles Knitting Strategy on the Enhanced Emission Efficiency and Stability of CsPbBr<sub>3</sub> Films

*Xiankan Zeng,<sup>a</sup> Wen Li,<sup>\*a</sup> Cheng Yan,<sup>a</sup> Jingjing Cao,<sup>a</sup> Xuehai Fu,<sup>a</sup> and Weiqing Yang<sup>\*ab</sup>*

<sup>a</sup> Key Laboratory of Advanced Technologies of Materials (Ministry of Education), School of Materials Science and Engineering, Southwest Jiaotong University, Chengdu 610031, PR China

<sup>b</sup> State Key Laboratory of Traction Power, Southwest Jiaotong University, Chengdu 610031, PR China

Corresponding Authors:

Email: [wqyang@swjtu.edu.cn](mailto:wqyang@swjtu.edu.cn)

Email: [liwen3337@swjtu.edu.cn](mailto:liwen3337@swjtu.edu.cn)

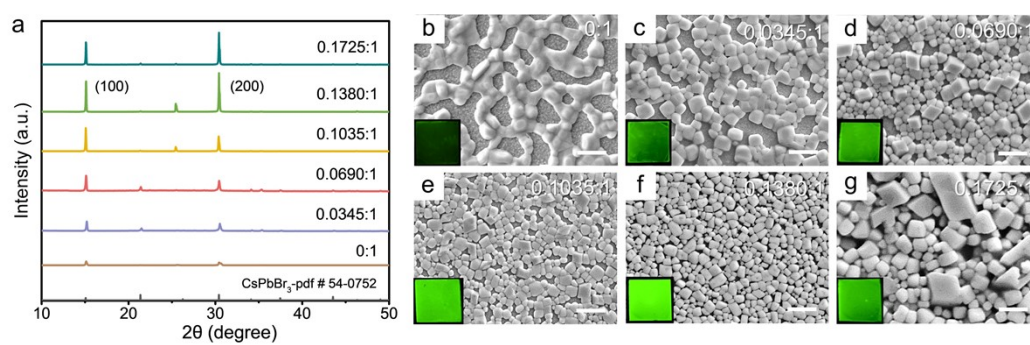

**Fig. S1** (a) XRD patterns and (b-g) SEM images of the perovskite films with different contents of PEO. The white scale bar is 1  $\mu\text{m}$ .

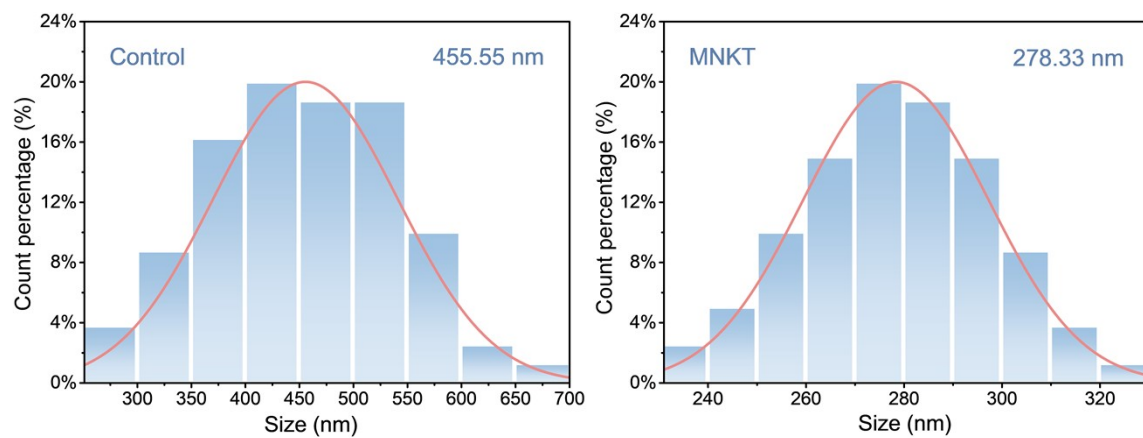

**Fig. S2** The statistical chart of particle size distribution of the control film and the MNKT-based film.

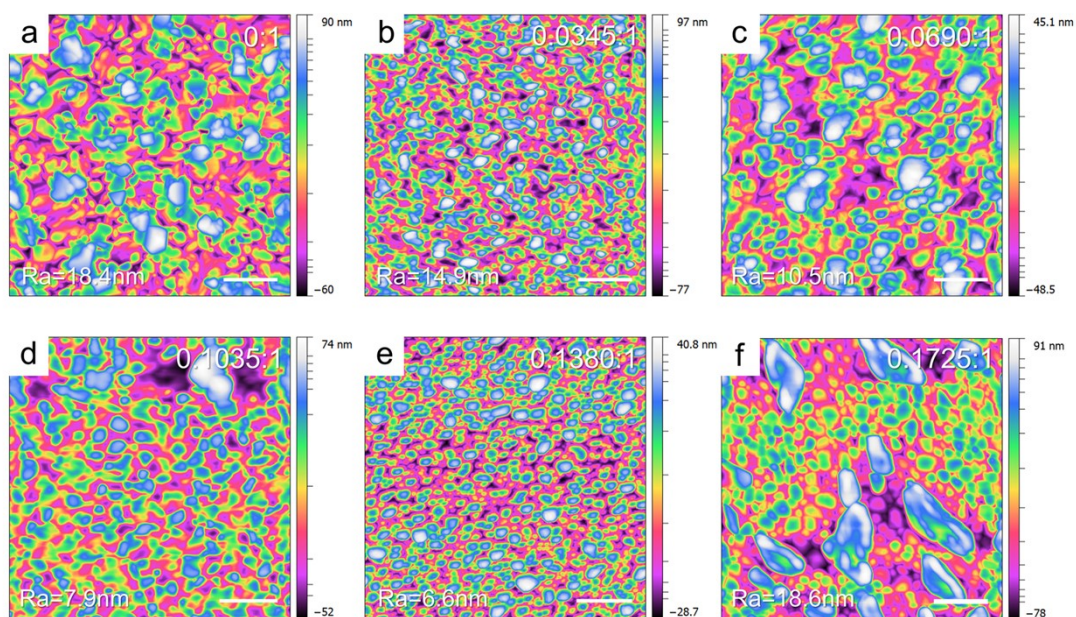

**Fig. S3** AFM images of the CsPbBr<sub>3</sub> films with different contents of PEO. The white scale bar is 1 μm.

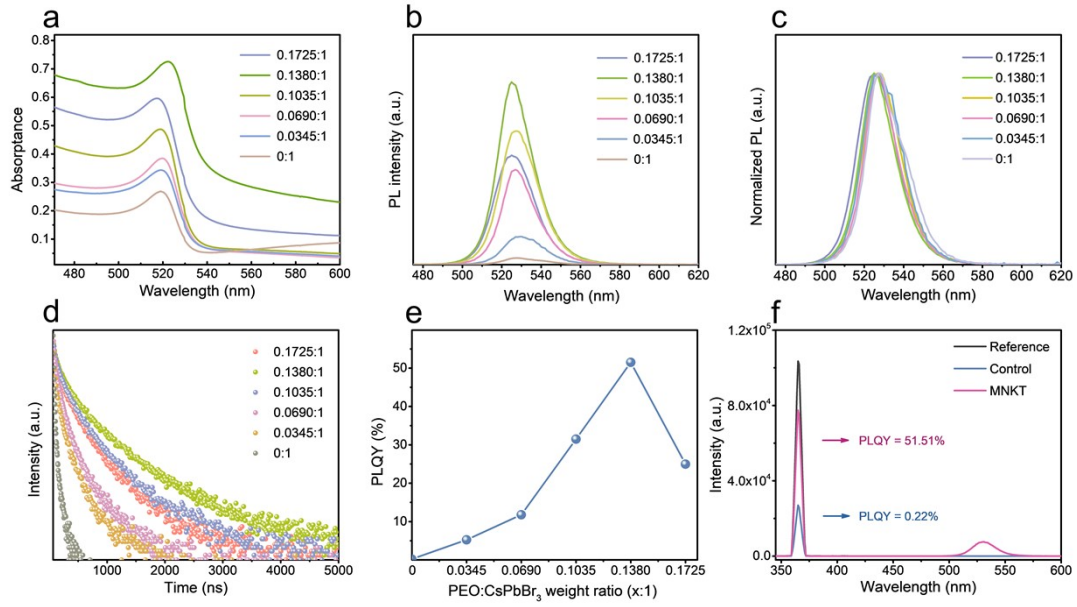

**Fig. S4** (a) UV absorption, (b) PL spectra, (c) the normalized PL spectra, (d) time-resolved PL decays and (e) PLQY of pristine and optimized CsPbBr<sub>3</sub> films with different PEO ratios. (f) A detail observation of PLQY spectra of the films with and without MNKT strategy.

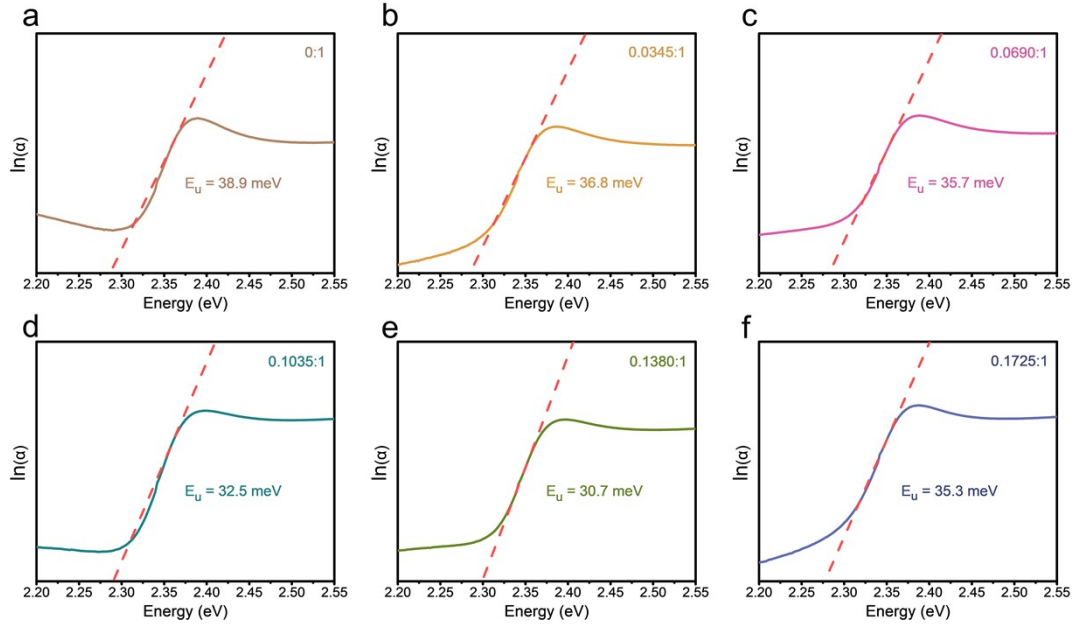

**Fig. S5** The  $E_u$  of the  $\text{CsPbBr}_3$  films with different contents of PEO quantified from Tauc Plot.

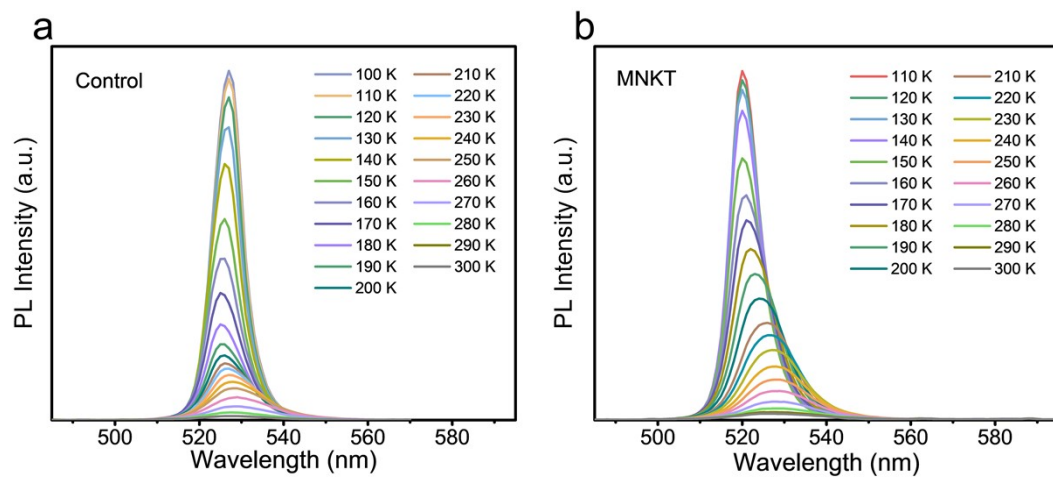

**Fig. S6** The temperature-dependent PL spectra of the films before and after MNKT management.

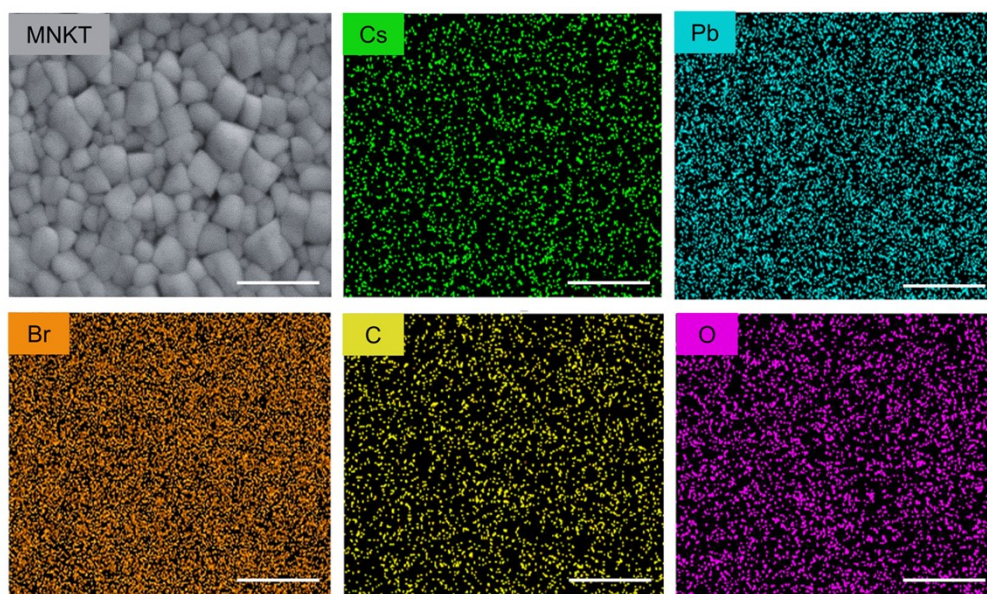

**Fig. S7** The EDS elemental mapping images and the concrete element contents of the MNKT-based film. The white scale bar is 1  $\mu\text{m}$ .

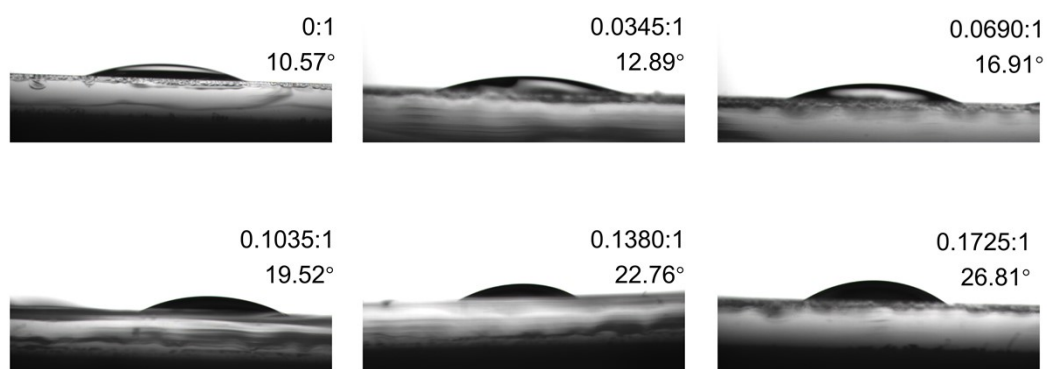

**Fig. S8** The contact angle between CsPbBr<sub>3</sub> films with different PEO contents and water droplets.

**Table S1** Parameters of the perovskite films with various weight ratios of PEO.

| PEO:CsPbBr <sub>3</sub><br>(weight ratio) | $\tau_1$ (ns) | $\tau_2$ (ns) | $\tau_{ave}$ (ns) | PLQY (%) | $K_r (\times 10^6 \text{ s}^{-1})$ | $K_{nr} (\times 10^7 \text{ s}^{-1})$ |
|-------------------------------------------|---------------|---------------|-------------------|----------|------------------------------------|---------------------------------------|
| 0:1                                       | 5.26          | 22.36         | 5.26              | 0.22     | 0.4182                             | 18.9678                               |
| 0.0345:1                                  | 11.79         | 96.40         | 12.03             | 5.24     | 4.3553                             | 7.8762                                |
| 0.0690:1                                  | 21.19         | 127.67        | 25.87             | 11.77    | 4.5503                             | 3.4110                                |
| 0.1035:1                                  | 31.64         | 267.75        | 56.11             | 31.49    | 5.6123                             | 1.2210                                |
| 0.1380:1                                  | 39.82         | 366.39        | 82.67             | 51.51    | 6.2305                             | 0.5865                                |
| 0.1725:1                                  | 28.78         | 245.90        | 45.54             | 24.98    | 5.4855                             | 1.6474                                |
